# Supplementary material for: Boosting the performance of Zn ion hybrid supercapacitors by regulating the chemically and physically active sites of graphene films
Source: Royal Society of Chemistry journal article supplement (doi:10.1039/d4dt01911c), 2024-01-01
Supplement: d4dt01911c1.pdf [file d4dt01911c1.pdf]

## Supplementary information

### **Boosting the performance of Zn ion hybrid supercapacitor by regulating the chemical and physical active sites of graphene film**

Hedong Jiang<sup>1\*</sup>, Mengxue Jin<sup>1</sup>, Lingling Sun<sup>1</sup>, Dandan Huang<sup>1</sup>, Pingchun Guo<sup>1</sup>, Jiake Li<sup>1</sup>, Hua Zhu<sup>2</sup>, Yanxiang Wang<sup>1\*</sup>

*1. School of Materials Science and Engineering, Jingdezhen Ceramic University, Jingdezhen 333403, P. R. China.*

*2. School of Mechanical and Electronic Engineering, Jingdezhen Ceramic University, Jingdezhen 333403, P. R. China.*

Corresponding Author: Hedong Jiang; Yanxiang Wang

Tel.: +86-0798-8499678;

Fax: +86-0798-8499678;

Email: [hdjiang19@163.com](mailto:hdjiang19@163.com); [yxwang72@163.com](mailto:yxwang72@163.com)

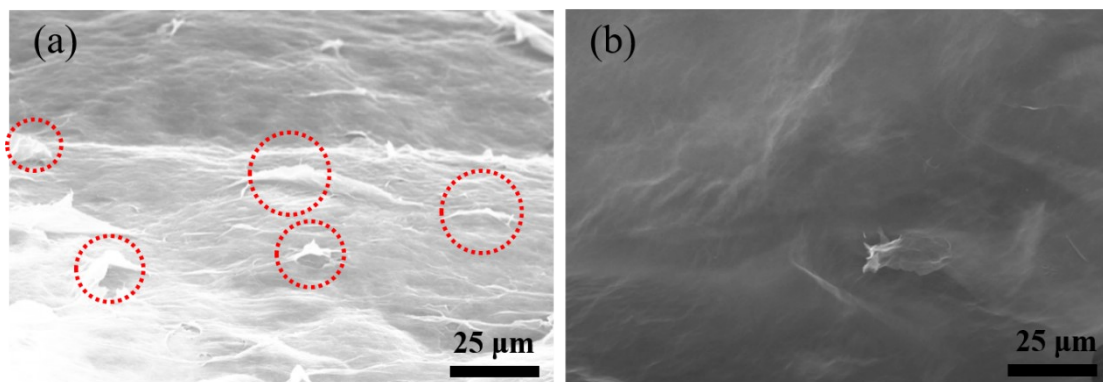

**Fig. S1** SEM images of RGO and RGO-N(DMF): the surface morphologies of (a) RGO and (b) RGO-N(DMF).

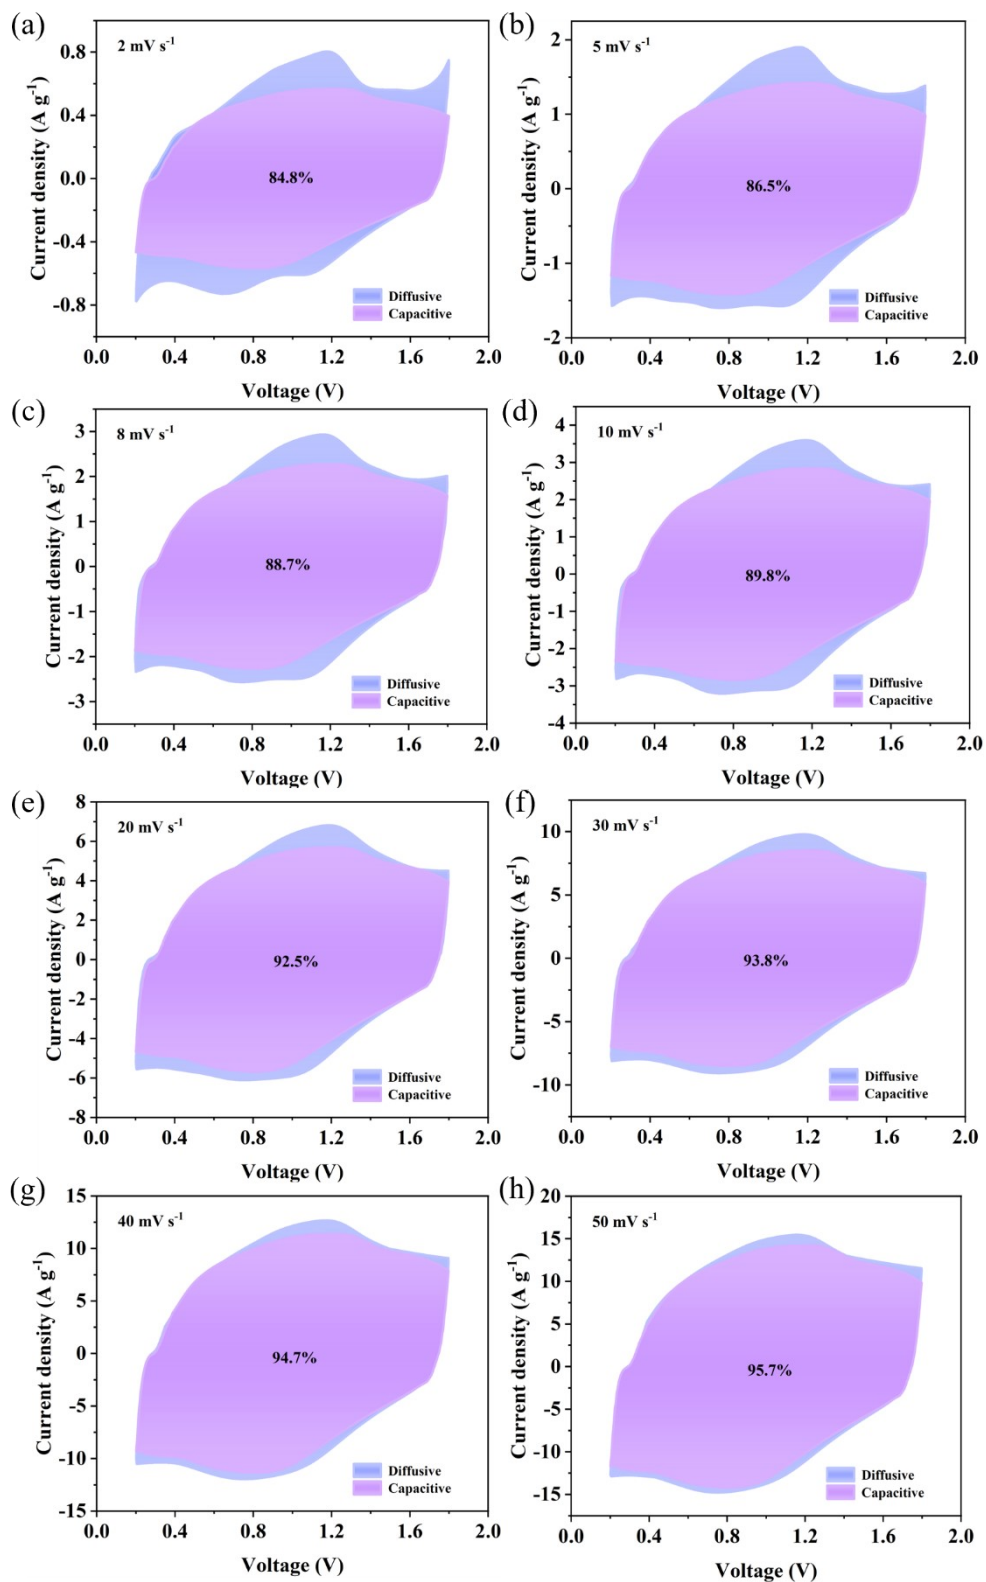

**Fig. S2** The electrochemical kinetics of the RGO-N(DMF) electrode in ZHS. (a-h) CV curves with the capacitive contribution at 2-50  $\text{mV s}^{-1}$ .

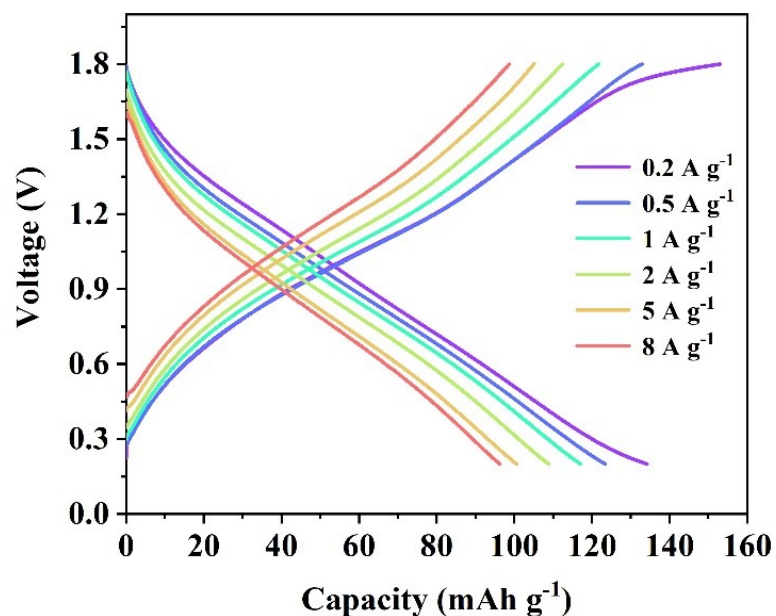

Fig. S3 GCD curve of RGO-N(DMF) electrode.

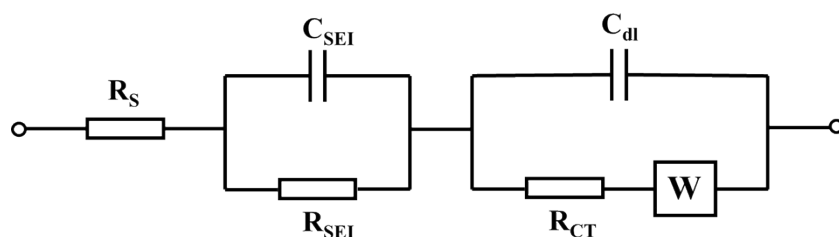

Fig. S4 The equivalent circuit model

Table S1 The ratio of functional groups in the O 1s XPS spectra

| Samples    | C=O    | COOH  | C-O/C-OH |
|------------|--------|-------|----------|
| RGO        | 23.48% | 38.7% | 36.7%    |
| RGO-N(DMF) | 37.19% | 25.9% | 35.2%    |

Table S2 The detailed values of  $R_S$ ,  $R_{SEI}$  and  $R_{CT}$  derived from Nyquist plots

| Sample     | $R_S$ ( $\Omega$ ) | $R_{SEI}$ ( $\Omega$ ) | $R_{CT}$ ( $\Omega$ ) |
|------------|--------------------|------------------------|-----------------------|
| RGO-N(DMF) | 3.3                | 68.8                   | 298.8                 |
| RGO        | 12.6               | 98.2                   | 597.5                 |
